# Supplementary material
Source: PubMed Central journal article supplement (PMC9389439)
Supplement: jamaoncol-e223218-s002.pdf [file jamaoncol-e223218-s002.pdf]

## Supplemental Online Content

Sanfilippo R, Hayward RL, Musoro J, et al. Activity of cabazitaxel in metastatic or inoperable locally advanced dedifferentiated liposarcoma: a phase 2 study of the EORTC Soft Tissue and Bone Sarcoma Group (STBSG). *JAMA Oncol*. Published online August 18, 2022. doi:10.1001/jamaoncol.2022.3218

**eFigure A.** Patient disposition for the Phase II trial of cabazitaxel

**eFigure 1.** Time to progression

**eFigure 2.** Overall survival

**eTable 1.** Summary of main clinical efficacy endpoints

**eTable 2.** Cabazitaxel-related clinical AEs (all grades) occurring in  $\geq 10\%$  of patients in the safety population

This supplemental material has been provided by the authors to give readers additional information about their work.

**eFigure A.**

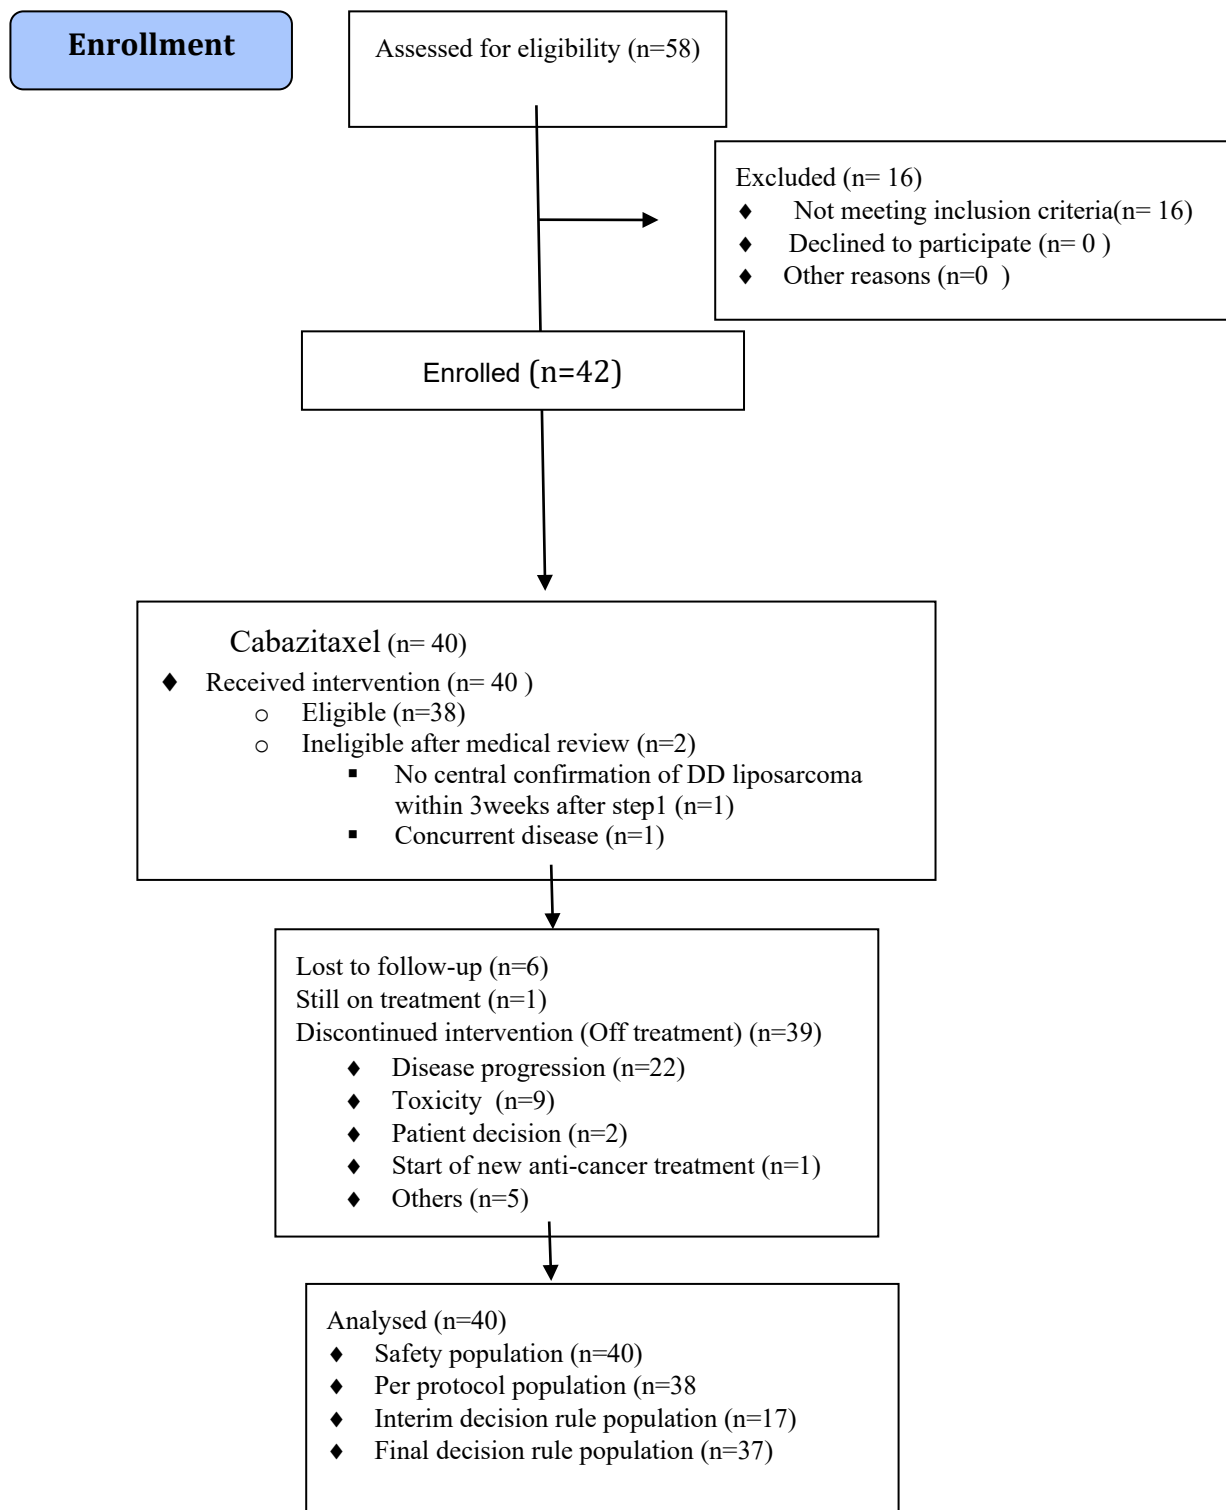

**eFigure A:** Patient disposition for the Phase II trial of cabazitaxel in metastatic or inoperable locally advanced dedifferentiated liposarcoma.

eFigure 1

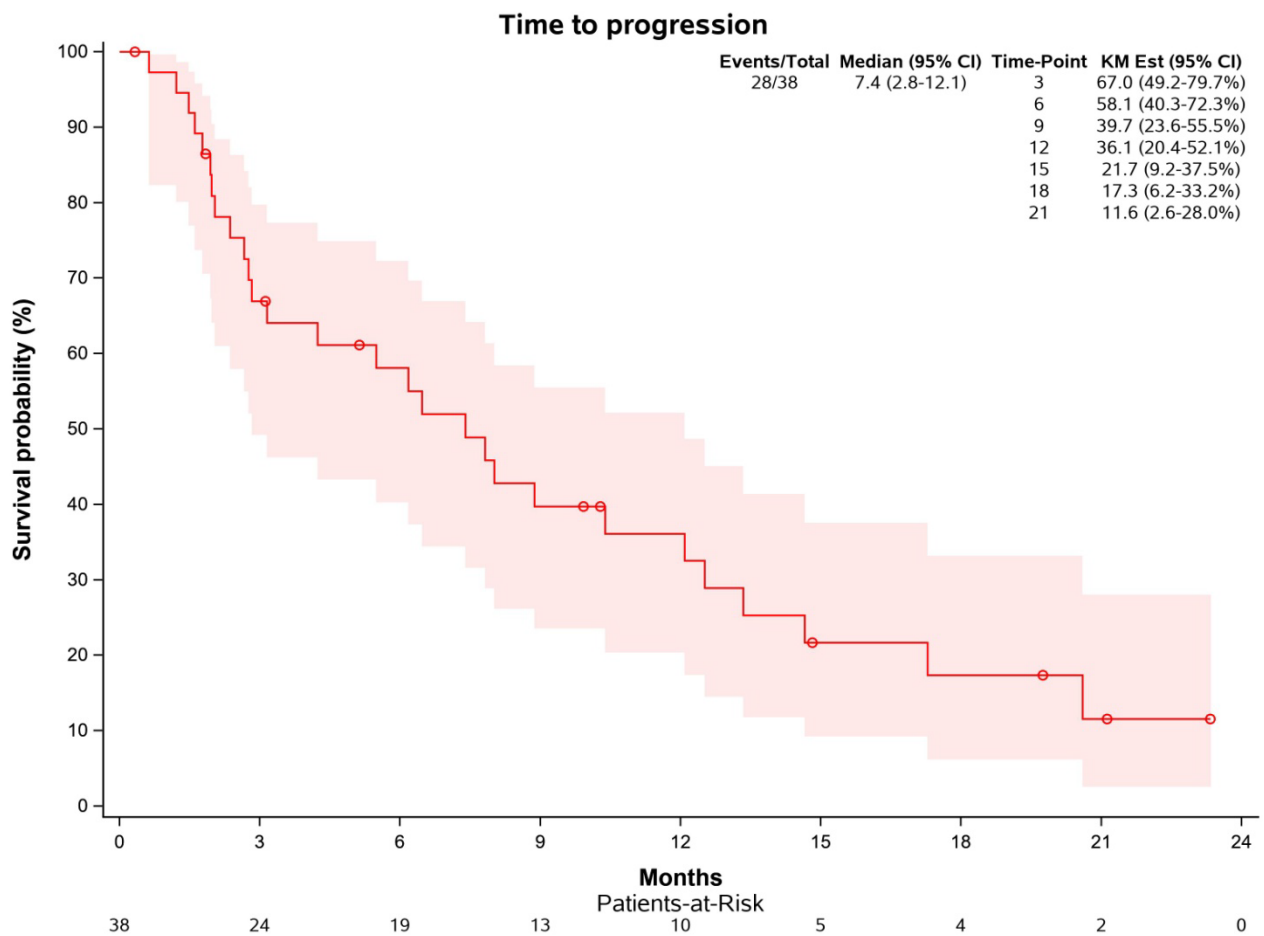

**eFigure 2**

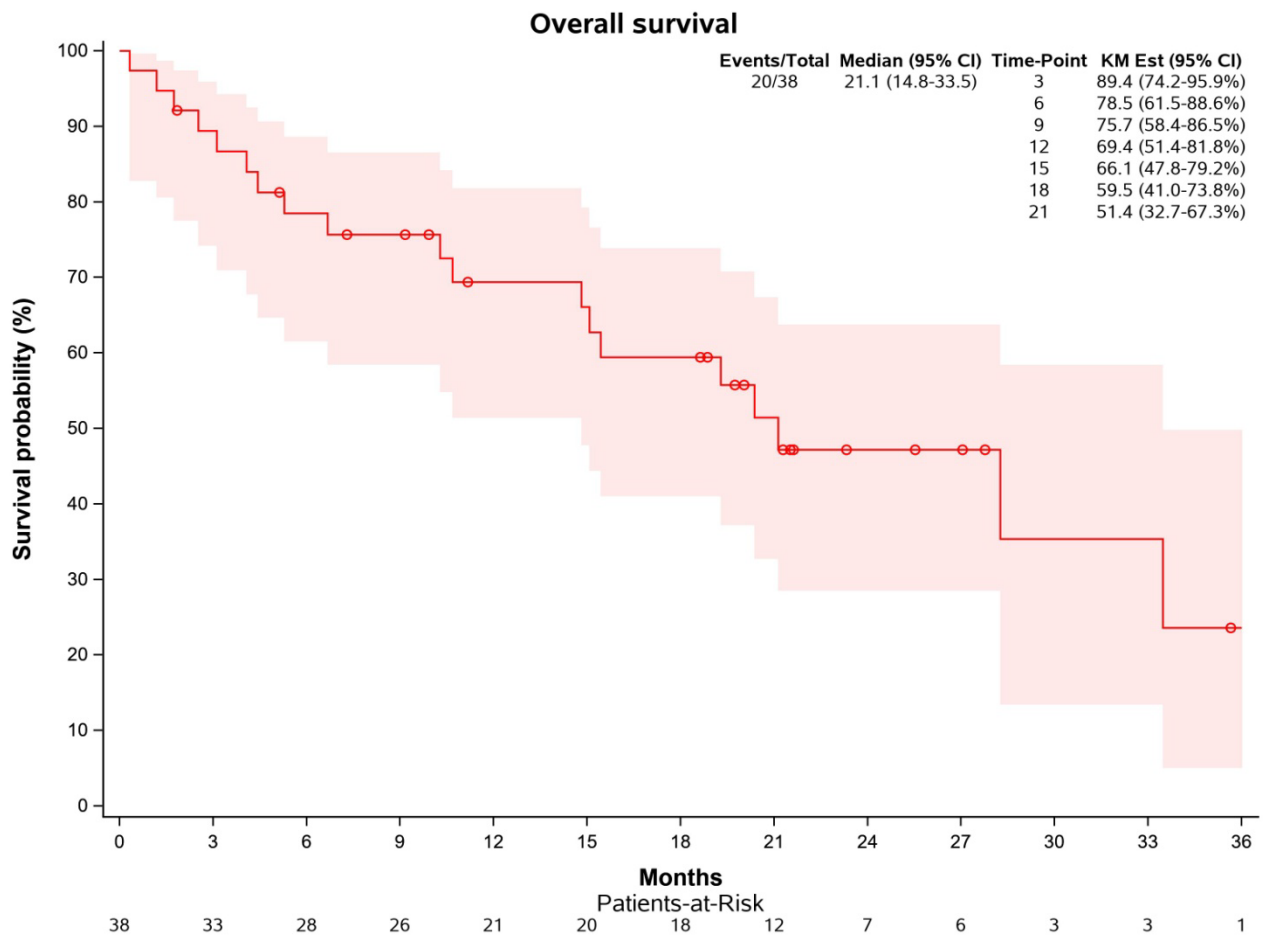

| <b>SUPPLEMENTARY MATERIAL</b>                                                                     |                                           |                                                  |                                                    |
|---------------------------------------------------------------------------------------------------|-------------------------------------------|--------------------------------------------------|----------------------------------------------------|
| <b>eTable 1.</b> Summary of main clinical efficacy endpoints.                                     |                                           |                                                  |                                                    |
|                                                                                                   | Per protocol population<br>(n=38)<br>n(%) | Final decision rule<br>population (n=37)<br>n(%) | Interim decision rule<br>population (n=17)<br>n(%) |
| <b><u>Progression free survival at 12 weeks (binary)</u></b>                                      |                                           |                                                  |                                                    |
| Progression free at 12 weeks (binary)                                                             |                                           |                                                  |                                                    |
| Success (%)<br>[conditional 1-sided 95 % CI ]                                                     | 21 (55.3)<br>[ 0.408 - 1 ]                | 21 (56.8)                                        | 11 (64.7)                                          |
| Response at 12 weeks                                                                              |                                           |                                                  |                                                    |
| Stable                                                                                            | 21 (55.3)                                 | 21 (56.8)                                        | 11 (64.7)                                          |
| Progression                                                                                       | 12 (31.6)                                 | 11 (29.7)                                        | 3 (17.6)                                           |
| Early death                                                                                       | 1 (2.6)                                   | 1 (2.7)                                          | 1 (5.9)                                            |
| Not evaluable                                                                                     | 4 (10.5)                                  | 4 (10.8)                                         | 2 (11.8)                                           |
| <b><u>Objective tumor response rate</u></b>                                                       |                                           |                                                  |                                                    |
| Best overall response                                                                             |                                           |                                                  |                                                    |
| Complete response                                                                                 | 1 (2.6)                                   |                                                  |                                                    |
| Partial response                                                                                  | 2 (5.3)                                   |                                                  |                                                    |
| Stable disease                                                                                    | 22 (57.9)                                 |                                                  |                                                    |
| Progressive disease                                                                               | 11 (28.9)                                 |                                                  |                                                    |
| Early death                                                                                       | 1 (2.6)                                   |                                                  |                                                    |
| Not evaluable                                                                                     | 1 (2.6)                                   |                                                  |                                                    |
| Objective response (CR+PR)                                                                        |                                           |                                                  |                                                    |
| CR+PR (%)<br>[Exact binomial 95 % CI ]                                                            | (7.9)<br>[1.7% to 21.4%]                  |                                                  |                                                    |
| Median time to onset of response                                                                  | 8 mo (range: 5.1 - 8.3 mo)                |                                                  |                                                    |
| <b><u>Median survival estimate</u></b>                                                            |                                           |                                                  |                                                    |
| Progression free survival (95% CI)                                                                | 6.5 mo (2.8-10.3 mo)                      |                                                  |                                                    |
| Time to progression (95% CI)                                                                      | 7.4 mo (2.8-12.1 mo)                      |                                                  |                                                    |
| Overall survival (95% CI)                                                                         | 21.1 mo (14.8-33.5 mo)                    |                                                  |                                                    |
| Abbreviations: ; CI, confidence interval; CR, complete response; PR, partial response; Mo, months |                                           |                                                  |                                                    |

**SUPPLEMENTARY MATERIAL****eTable 2:** Cabazitaxel-related clinical AEs (all grades) occurring in  $\geq 10\%$  of patients in the safety population.

|                                    | <b>Grade<br/>1<br/>N (%)</b> | <b>Grade<br/>2<br/>N (%)</b> | <b>Grade<br/>3<br/>N (%)</b> | <b>Grade<br/>4<br/>N (%)</b> | <b>Grade<br/>5<br/>N (%)</b> | <b>Grade<br/><math>\geq 1</math><br/>N (%)</b> |
|------------------------------------|------------------------------|------------------------------|------------------------------|------------------------------|------------------------------|------------------------------------------------|
| All AEs                            | 4 (10.0)                     | 3 (7.5)                      | 13 (32.5)                    | 17 (42.5)                    | 1 (2.5)                      | 38 (95.0)                                      |
| Anemia                             |                              | 8 (20)                       | 4 (10)                       |                              |                              | 12 (30)                                        |
| Febrile Neutropenia                |                              |                              | 9 (22.5)                     | 1 (2.5)                      |                              | 10 (25)                                        |
| Abdominal Pain                     |                              | 5 (12.5)                     | 1 (2.5)                      |                              |                              | 6 (15)                                         |
| Constipation                       | 3 (7.5)                      | 1 (2.5)                      |                              |                              |                              | 4 (10)                                         |
| Diarrhea                           | 11 (27.5)                    | 3 (7.5)                      | 3 (7.5)                      |                              |                              | 17 (42.5)                                      |
| Dyspepsia                          | 4 (10)                       | 2 (5)                        |                              |                              |                              | 6 (15)                                         |
| Nausea                             | 10 (25)                      | 6 (15)                       | 1 (2.5)                      |                              |                              | 17 (42.5)                                      |
| Vomiting                           | 3 (7.5)                      | 2 (5)                        | 1 (2.5)                      |                              |                              | 6 (15)                                         |
| Fatigue                            | 6 (15)                       | 5 (12.5)                     | 5 (12.5)                     |                              |                              | 16 (40)                                        |
| Fever                              | 4 (10)                       | 1 (2.5)                      |                              | 1 (2.5)                      |                              | 6 (15)                                         |
| Pain                               | 3 (7.5)                      |                              | 1 (2.5)                      |                              |                              | 4 (10)                                         |
| Alanine Aminotransferase Increased | 3 (7.5)                      | 1 (2.5)                      |                              |                              |                              | 4 (10)                                         |
| Lymphocyte Count Decreased         | 1 (2.5)                      | 3 (7.5)                      |                              |                              |                              | 4 (10)                                         |
| Neutrophil Count Decreased         |                              | 1 (2.5)                      | 4 (10)                       | 16 (40)                      |                              | 21 (52.5)                                      |
| Weight Loss                        | 7 (17.5)                     | 4 (10)                       |                              |                              |                              | 11 (27.5)                                      |
| White Blood Cell Decreased         |                              | 1 (2.5)                      |                              | 3 (7.5)                      |                              | 4 (10)                                         |
| Anorexia                           | 8 (20)                       | 4 (10)                       | 1 (2.5)                      |                              |                              | 13 (32.5)                                      |
| Arthralgia                         | 1 (2.5)                      | 3 (7.5)                      |                              |                              |                              | 4 (10)                                         |
| Dysgeusia                          | 5 (12.5)                     |                              | 1 (2.5)                      |                              |                              | 6 (15)                                         |
